# Supplementary material for: Liquid/liquid interface in periodic boundary condition
Source: Royal Society of Chemistry journal article supplement (doi:10.1039/d0cp04629a), 2020-12-08
Supplement: d0cp04629a1.pdf [file d0cp04629a1.pdf]

## Electronic Supplementary Information for: Liquid/liquid interface in periodic boundary condition

Marin Vatin,<sup>a</sup> Magali Duvail,<sup>a</sup> Philippe Guilbaud,<sup>b</sup> and Jean-François Dufrêche<sup>a,‡</sup>

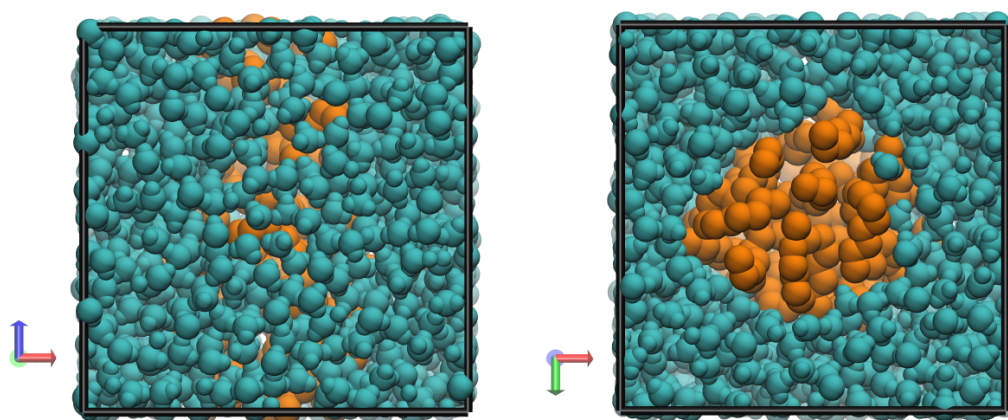

**Fig. S1** Snapshots representing *n*-heptane cylinder in water in a cubic box, on the left, with cylinder oriented upwards, on the right, with the cylinder normal to the plane delimited by the sheet. Water atoms are in blue and heptane carbons are in orange.

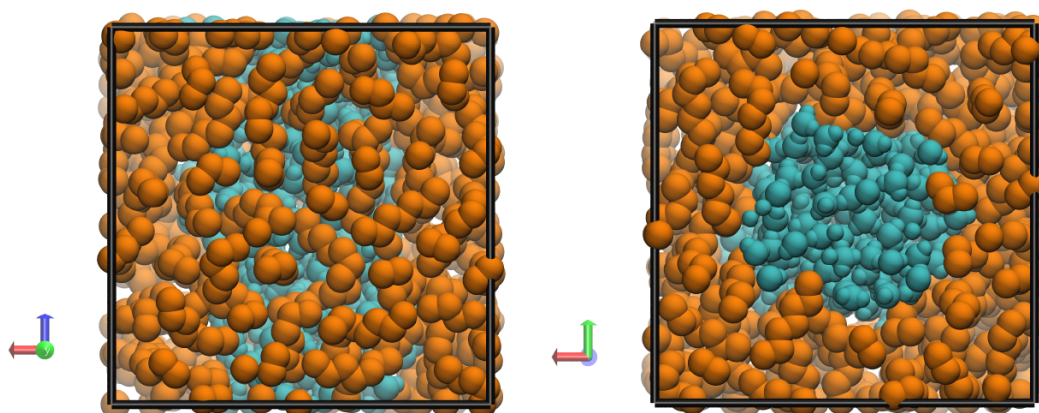

**Fig. S2** Snapshots representing water cylinder in *n*-heptane a cubic box, on the left, with cylinder oriented upwards, on the right, with cylinder normal to the plane delimited by the sheet.

<sup>a</sup> ICSM, CEA, Univ Montpellier, CNRS, ENSCM, Marcoule, France.

<sup>b</sup> CEA, DES, ISEC, DMRC, LILA, Univ Montpellier, Marcoule, France.

‡ Corresponding author (jean-francois.dufreche@icsm.fr)

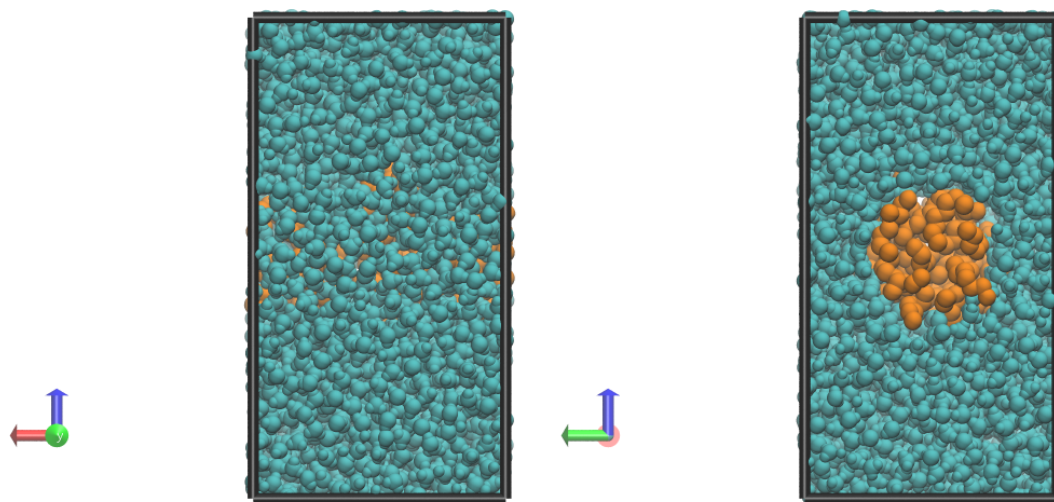

**Fig. S3** Snapshots representing *n*-heptane cylinder in water in an elongated box, on the left with cylinder oriented according to a plan delimited by the sheet, on the right, according to the normal of the plane delimited by the sheet.

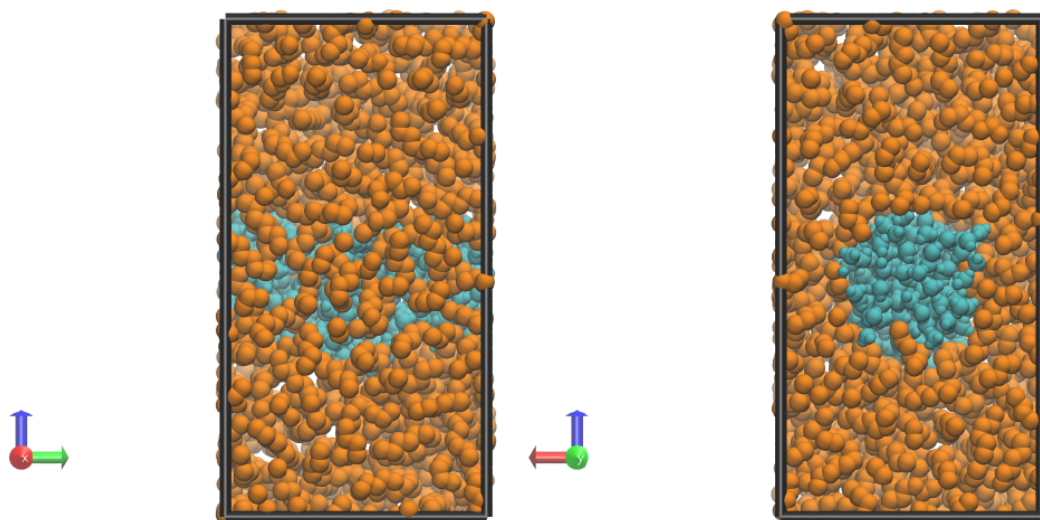

**Fig. S4** Snapshots representing water cylinder in *n*-heptane an elongated box, on the left with cylinder oriented according to a plan delimited by the sheet, on the right, according to the normal of the plane delimited by the sheet.
